# Supplementary material
Source: PubMed Central journal article supplement (PMC4204786)
Supplement: supp_mcu132_mcu132supp.pdf [file supp_mcu132_mcu132supp.pdf]

## SUPPLEMENTARY DATA

**Figure S1. Reporter *TFL1::GUS* constructs.** (A) Diagram of the genomic region encompassing the *TFL1* gene. The *TFL1* gene and the flanking open reading frames are represented by light blue boxes, and the intergenic regions by a grey line. In the *TFL1* gene, the 5' and 3' untranslated regions (UTRs) are represented by white boxes. (B) Diagram of the pBTG1 construct. In pBTG1, the *GUS* gene is flanked, in its 5', by a DNA fragment including the complete 5' intergenic region and the *TFL1* 5' UTR (2172 bp) and, in its 3', by a DNA fragment including part of the *TFL1* 3' intergenic region (2722 bp, starting downstream the *TFL1* 3' UTR - i.e., pBTG1 does not contain the *TFL1* 3' UTR). (C) Diagram of the pBTG6 construct. In pBTG6, the *GUS* gene is flanked, in its 5', by a DNA fragment including the complete 5' intergenic region and the *TFL1* 5' UTR (2172 bp) and, in its 3', by a DNA fragment including the complete 3' intergenic region and the *TFL1* 3' UTR (4667 bp).

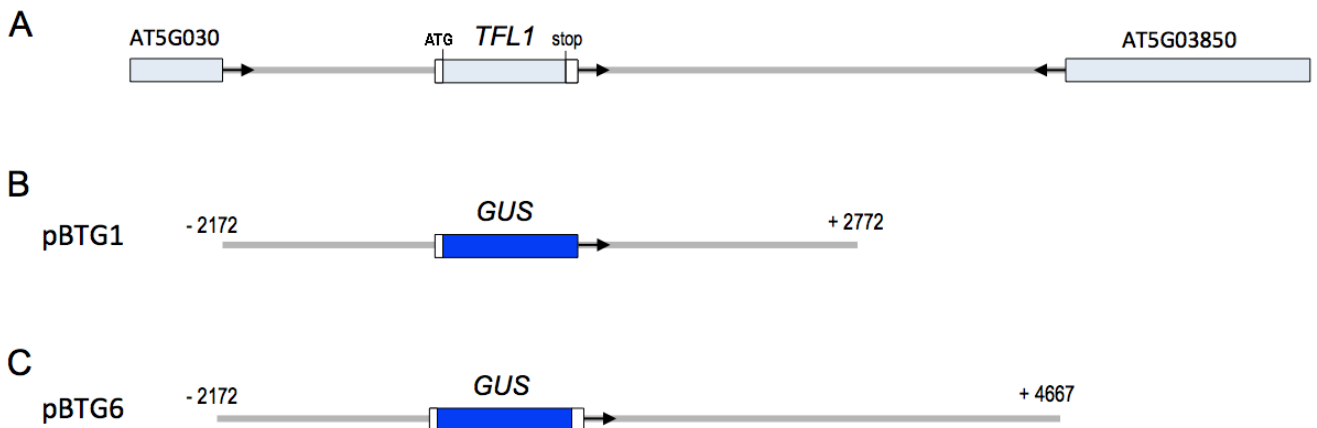

**Table S1.** List of primers used in this study.

| <b>Gene</b>  | <b>Purpose</b>                                  | <b>Primer</b> | <b>Sequence</b>                             |
|--------------|-------------------------------------------------|---------------|---------------------------------------------|
| <i>TFL1</i>  | 5' intergenic region of <i>TFL1</i>             | TFL15'intF    | TGAGTCGACGCTAGGAGATTGTTGATC                 |
| <i>TFL1</i>  | 5' intergenic region of <i>TFL1</i>             | TFL15'intR    | CTGCAGGATCCTTTGTAACTTAGAGG                  |
| <i>TFL1</i>  | 3' intergenic region of <i>TFL1</i>             | TFL13'2.7F    | GTAGAGCTCTAGAAGTATTGATAACGATCTG<br>TCG      |
| <i>TFL1</i>  | 3' intergenic region of <i>TFL1</i>             | TFL13'2.7R    | TAGAATTCGGTACCAGAGTCGTTCTAAACCG<br>AAGTATGG |
| <i>AGO1</i>  | Genotyping of the <i>ago1-26</i> mutation.      | AGOF1         | GTATGCAAGATTGTTGAAG                         |
| <i>AGO1</i>  | Genotyping of the <i>ago1-52</i> mutation.      | AGOF8         | AAATCTGCCACCCTACAGAGTTTG                    |
| <i>AGO1</i>  | Genotyping of the <i>ago1-52</i> mutation.      | AGOR6         | GTCATAAAGATAGATAGAGGGTG                     |
| <i>AGO1</i>  | Genotyping of the <i>ago1-26</i> mutation.      | AGOR8         | CCATCCCTGTGCAGAATAACC                       |
| <i>AGO1</i>  | Genotyping of the <i>moss/ago1-103</i> mutation | dCAPmoss-Fw   | CATTGGTTTTTAACCCCTTTGTTAATTCTAG             |
| <i>AGO1</i>  | Genotyping of the <i>moss/ago1-103</i> mutation | dCAPmoss-Rv   | AGTAAAGTTGTTCTCATCCCAAAGAACGTG              |
| <i>UBQ10</i> | RT-qPCR                                         | UBQ-Fw        | CCTTGTATAATCCCTGATGAATAAGTGT                |
| <i>UBQ10</i> | RT-qPCR                                         | UBQ-Rv        | AACAGGAACGGAAACATAGTAGAACA                  |
| <i>GUS</i>   | RT-qPCR                                         | GUS-Fw        | ACCGTACCTCGCATTACCCCTT                      |
| <i>GUS</i>   | RT-qPCR                                         | GUS-Rv        | CATCTGCCAGTCGAGCAT                          |
| <i>TFL1</i>  | RT-qPCR                                         | TFL1-Fw       | AAGCAAAGACGTGTTATCTTTCCTAAT                 |
| <i>TFL1</i>  | RT-qPCR                                         | TFL1-Rv       | GTTGAAGTGATCTCTCGAAGGGAT                    |
